# Supplementary material for: Role of the WNT/β-catenin/ZKSCAN3 Pathway in Regulating Chromosomal Instability in Colon Cancer Cell lines and Tissues
Source: MDPI journal article supplement (doi:10.3390/ijms23169302), 2022-08-18
Supplement: s1 [file s1]

**Supplementary Table S1.** Primer sequences used for real-time quantitative PCR.

| Gene            | Forward primer 5' to 3' | Reverse primer 5' to 3'   | Size (bp) |
|-----------------|-------------------------|---------------------------|-----------|
| <i>PSMD10</i>   | GCAGGTTGGTCTCCTCTTCA    | GTCTTGGATGTTTGTGGATGCT    | 294       |
| <i>AURKB</i>    | CTGCACCATCCCAACATCCT    | GCATCTGCCAACTCCTCCAT      | 167       |
| <i>ANAPC11</i>  | CGGGTAGGGCGAGACGG       | CCACAGTTCTCATCGTTGGC      | 156       |
| <i>PSMB6</i>    | GGGAAGGCATGACCAAGGAA    | GCGAGAGCTGTGGATAAAAGA     | 72        |
| <i>CDK1</i>     | GGAAGGGGTTCTAGTACTGC    | AGAGTGTTACTACCTTAACAAGTGA | 209       |
| <i>BUB3</i>     | GCATCGCATCACTTGCCCTC    | GGATGATTAGGTGGACTTGGGT    | 155       |
| <i>MAD2L1</i>   | CGTGCTGCGTCGTTACTTTT    | ATGGCCAGGGACACAAACAA      | 109       |
| <i>VPS35</i>    | AGAACCCATGTTGTCCTCTGG   | AGTGAGCTCTGTGAATATATGAGAA | 284       |
| <i>CDC20</i>    | AATGTGTGGCCTAGTGCTCC    | AGCACACATTCCAGATGCGA      | 116       |
| <i>ZKSCAN3</i>  | GAGCTCTGCCCTTGTCATTC    | CTCCCCAGTGTGGATTCTGT      | 211       |
| <i>CCNC</i>     | AGTCGAGCCGAGCTGATTTG    | CCTTTTGGCGCTCCTTCAAC      | 197       |
| <i>CCNT1(a)</i> | AATAGCCCATCCCGTCGTTT    | CCAGGGAACTGTGTGAAGGA      | 179       |
| <i>CCNB2</i>    | TGCCTCCCCACTGATAGGAA    | AAAGGGCACAATGAAGCACAC     | 70        |
| <i>BRCA2</i>    | CTGAAACTAGGCGGCAGAGG    | CAAATCTGTCCCCTCACGCT      | 115       |
| <i>MAD2L2</i>   | TGCATCTCATCCTCTACGTG    | TCCTGGATATACTGATTACAGC    | 118       |
| <i>MCM3</i>     | AGTTCGTCCCAAAGTCGTCC    | GGGGATTGTTCTCCTCATCCT     | 143       |
| <i>CDKN2B</i>   | GAATGCGCGAGGAGAACAA     | CATCATCATGACCTGGATCGC     | 172       |
| <i>BCL2</i>     | TCGCCCTGTGGATGACTGA     | CAGAGACAGCCAGGAGAAATCA    | 134       |
| <i>BCL2L4</i>   | TGGCAGCTGACATGTTTTCTGAC | TCACCCAACCACCCTGGTCTT     | 195       |
| <i>GAPDH</i>    | CCACTCCTCCACCTTTGAC     | ACCCTGTTGCTGTAGCCA        | 112       |

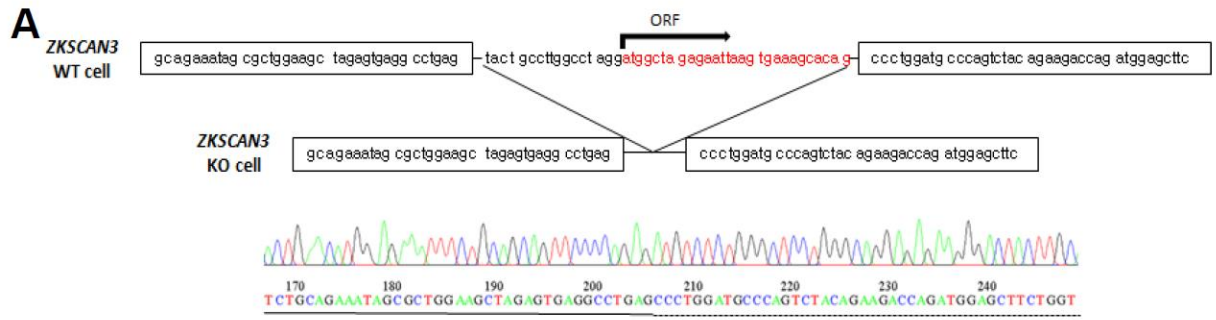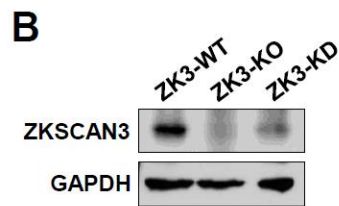

**Supplementary Figure S1.** (A) Construction and sequencing results of ZKSCAN3 knockout cells by CrisPR/Cas9 system are shown. (B) Cell extracts were prepared from parental HCT116 (ZK3-WT), homozygous KO (ZK-KO), or heterozygous KO (ZK3-KD) cells. Cell lysates were then analyzed by western blot for the expression level of ZKSCAN3 using the indicated antibodies.

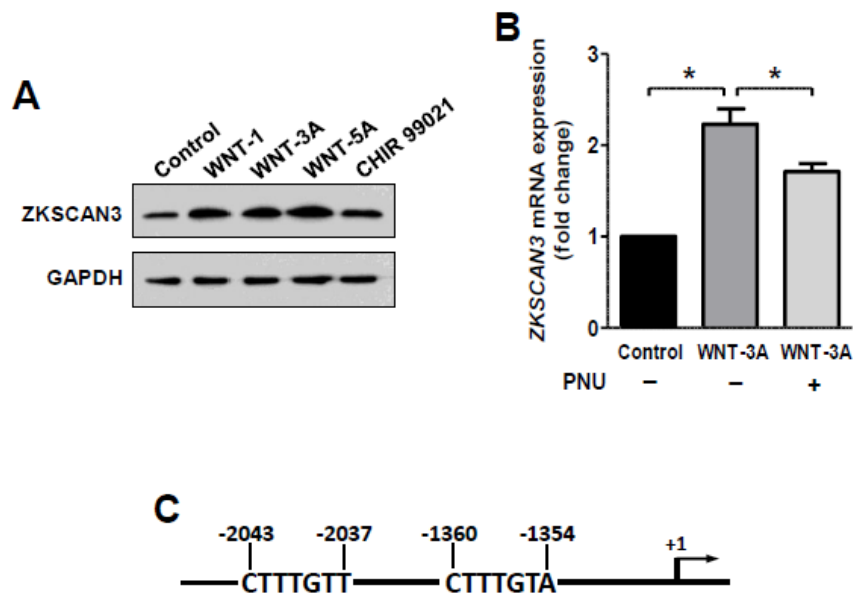

**Supplementary Figure S2.** (A) NCM365D normal colonic epithelial-derived cells were treated with WNT-1 (50 ng/ml), WNT-3A (100 ng/ml), WNT-5A (50 ng/ml), or CHIR 99021 (3  $\mu$ M) for 24 h, and cell lysates were subjected for western blot using the indicated antibodies. (B) Cells were treated with WNT-3A for 24 h in the presence or absence of 40  $\mu$ M PNU and then cells were harvested. Extracted mRNA was subjected to qPCR against ZKSCAN3. Data represent means  $\pm$  SD of triplicate measurements. Statistical significance was determined using the Kruskal-Wallis test (\*  $p < 0.05$ ). (C) Schematic diagram of the human ZKSCAN3 gene promoter.

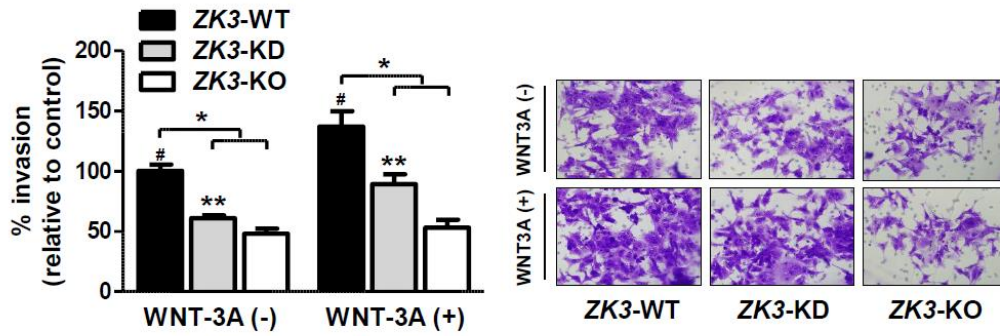

**Supplementary Figure S3.** Cell invasion assays were performed using a Boyden chamber in the presence or absence of WNT-3A (100 ng/ml) for 24 h. Data shown as percentage of migrated cells relative to control were expressed as means  $\pm$  SD. Statistical significance was determined using the Kruskal-Wallis test (\*, \*\*, #  $p < 0.05$ ). Representative images of the migration assays are presented in the right panel.

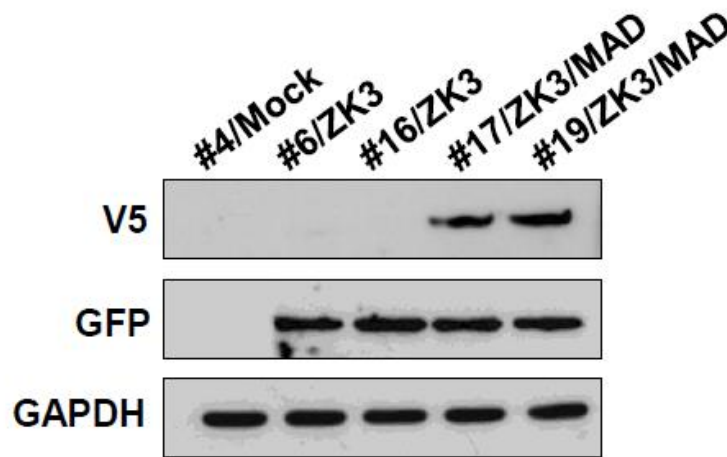

**Supplementary Figure S4.** Western blot images of HCT116 cells transfected with pcDNAV5 (#4N/Mock), HCT116 cells transfected with pcDNAV5-ZK3 (#6/ZK3 and #16/ZK3), and HCT116 cells co-transfected with pcDNAV5-ZK3 and pDEST-MAD2L2-GFP (#17/ZK3/MAD and #19/ZK3/MAD) using anti-V5, -GFP, and -GAPDH antibodies.

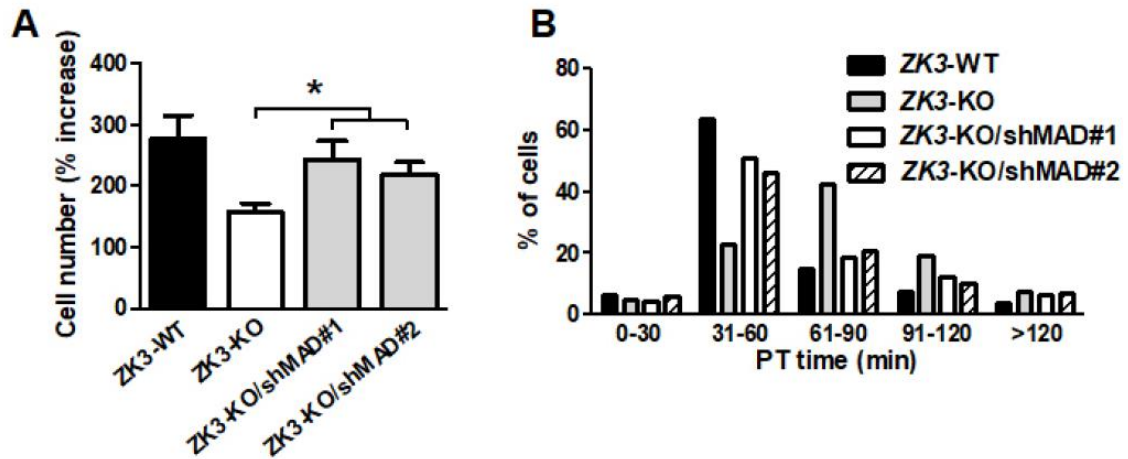

**Supplementary Figure S5.** (A) ZK3-KO/shMAD cells were constructed by stably transfecting ZK3-KO cells with MAD2L2 shRNA (shMAD). Cell proliferation rate of the indicated cells was determined by sequential monitoring with incuCyte. Presented data obtained 6 days after initial seeding, were expressed as means  $\pm$  SDs. Statistical significance was determined using the Kruskal-Wallis test (\*  $p < 0.05$ ). (B) Time-lapse analysis of ZK3-WT, ZK3-KO, ZK3-KO/shMAD#1, and ZK3-KO/shMAD#2 cells. Cells stably expressing histone 2B-RFP were cultured in a live cell instrument and PT time was measured. The graph displays the percentage of cells according to time distribution consumed from prometaphase to telophase. At least 50 cells were observed per sample.
